# Supplementary material for: FoxP1 Stimulates Angiogenesis by Repressing the Inhibitory Guidance Protein Semaphorin 5B in Endothelial Cells
Source: PubMed Central journal article supplement (PMC3759435; doi:10.1371/journal.pone.0070873), 2013-09-02
Supplement: pone.0070873.s001.pdf [file pone.0070873.s001.pdf]

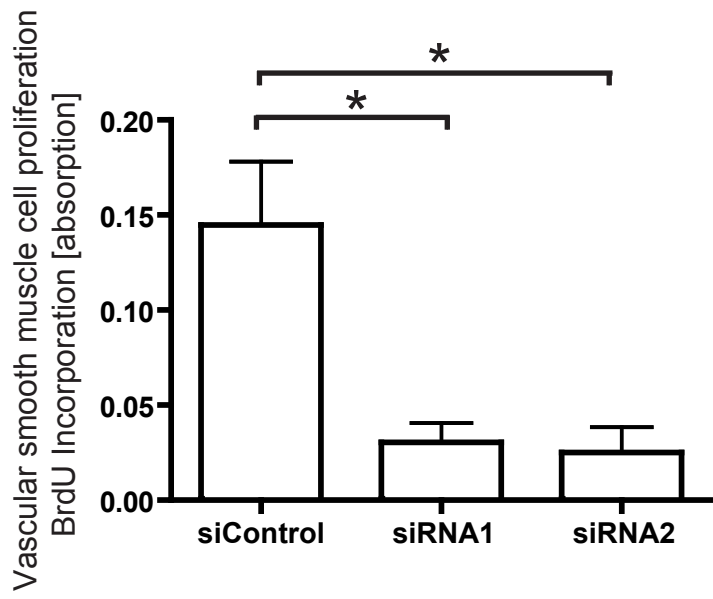

**Supplementary Figure 1:** *Foxp1* knockdown attenuates vascular smooth muscle cell proliferation
