# Supplementary material for: FoxP1 Stimulates Angiogenesis by Repressing the Inhibitory Guidance Protein Semaphorin 5B in Endothelial Cells
Source: PubMed Central journal article supplement (PMC3759435; doi:10.1371/journal.pone.0070873), 2013-09-02
Supplement: pone.0070873.s002.pdf [file pone.0070873.s002.pdf]

Grundmann, Foxp1 stimulates neovascularization

## **Supplemental Methods**

### *Histology*

For immunohistology, 5µm frozen tissue sections were processed as previously described<sup>5</sup>, incubated with the appropriate primary and secondary antibodies (see supplementary table 1) and embedded in moviol. DAPI dye was used for nuclear staining. Imaging was performed on a Zeiss Axioplan microscope and images were processed with Adobe Photoshop 7.0 for contrast enhancement.

### *Zebrafish Stocks, Morpholino Design, Phenotype Analysis and Detection of Splice Variants of Zebrafish FoxP1 mRNA with RT-PCR*

The wild-type AB strain and *Tg(vegfr4:gfp)<sup>s8436</sup>* (originally referred to as *Tg(flk1:EGFP)<sup>s843</sup>*) transgenic zebrafish were used in this study. Two splice-blocking morpholinos for zebrafish FoxP1a (MA1 and MA2) and its predicted paralogue FoxP1b (MB1 and MB2) were synthesized by Gene-Tools (Philomathe, OR). Morpholinos were dissolved in nuclease-free water at 50mM and injected into 1-2-cell stage embryos. The injected amount was determined by measuring the size of the liquid sphere injected into oil. Injected embryos were cultured in fish water at 28.5°C. For detection of splice variants, total RNA was isolated at 48hpf using Tripure and transcribed to cDNA as described below. Splice variants were visualized on agarose-gel and total Foxp1 mRNA was quantified by real-time RT-PCR as previously described<sup>4</sup>. The cardiovascular phenotype of the FoxP1 morphants was investigated by life microscopic imaging of the transgenic embryos and by confocal microscopy.

## Reagents

### PCR-primers

| gene    | species | forward (5'-> 3')        | reverse (5'-> 3')          |
|---------|---------|--------------------------|----------------------------|
| FoxP1   | human   | tcagtggtaacccttta        | gtacaggatgcacggctt         |
| Sema5b  | human   | gctggcttctctcactggt<br>c | agctggagagggtggga<br>cac   |
| β-actin | human   | gatcggcggctccatcct       | gactcgtcatactcctgct<br>tgc |

### primary antibodies

| against:  | host   | Cat #    | company            |
|-----------|--------|----------|--------------------|
| FoxP1     | rabbit | ab16645  | abcam              |
| Sema5b    | goat   | sc-67959 | Santa Cruz Biotech |
| c-myc     | mouse  | ab32     | abcam              |
| β-tubulin | mouse  | 556321   | BD Pharmingen      |
| GAPDH     | rabbit | E1C604   | Enogene            |

### secondary antibodies

| against:   | host   | Cat #  | company           |
|------------|--------|--------|-------------------|
| mouse IgG  | rabbit | HAF007 | R & D             |
| rabbit IgG | goat   | 31460  | Thermo Scientific |
| goat IgG   | rabbit | HAF017 | R & D             |

### siRNA

| description     | Cat #    | company    |
|-----------------|----------|------------|
| FOXP1-HSS120361 | 10620312 | invitrogen |
| FOXP1-HSS120362 | 10620312 | invitrogen |
| FOXP1-HSS120363 | 10620312 | invitrogen |

### cDNA Clones

| gene                    | Cat #    | company |
|-------------------------|----------|---------|
| Sema5b (Myc-DDK-tagged) | RC209657 | Origene |
| FoxP1                   | TC103781 | Origene |
